# Supplementary material for: UBE3A expression during early postnatal brain development is required for proper dorsomedial striatal maturation
Source: PubMed Central journal article supplement (PMC9977510; doi:10.1172/jci.insight.166073), 2023-02-22
Supplement: jciinsight-8-166073-s086.pdf [file jciinsight-8-166073-s086.pdf]

# Supplementary material

## Supplementary Figures

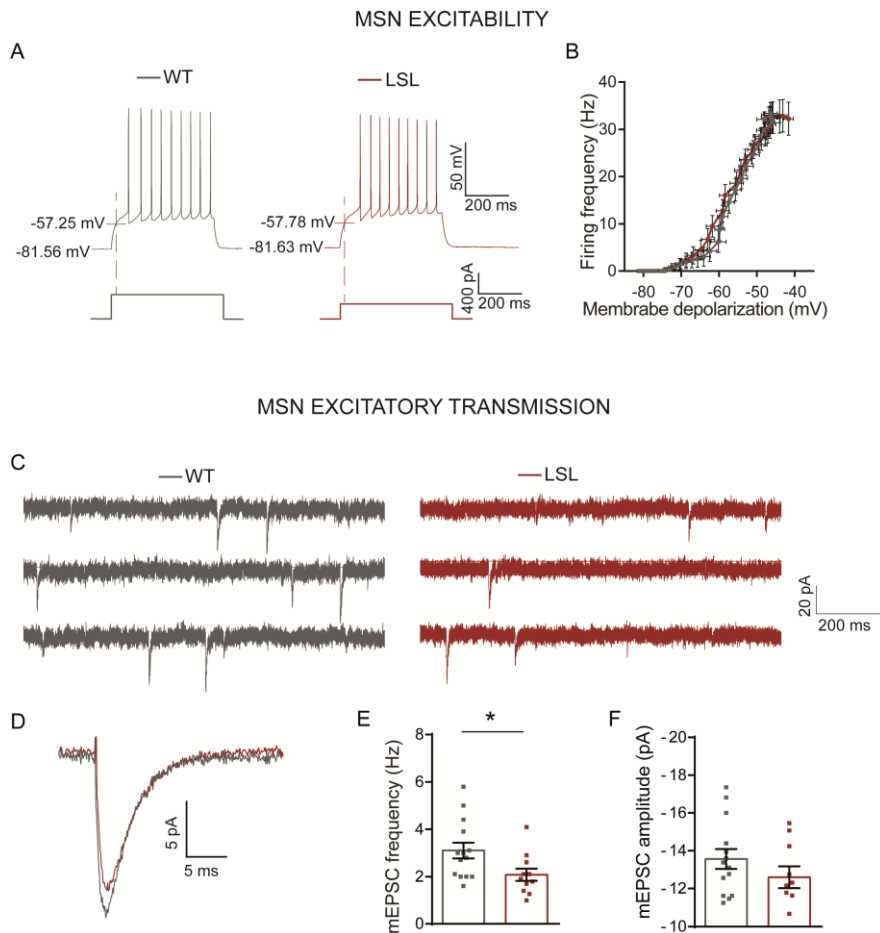

**Supplementary Figure 1. Firing rates and miniature excitatory synaptic currents - refers to Figure 1.**

(A) Representative firing pattern of MSNs (top) obtained with current injection (bottom) showing that similar depolarization at 25ms (dotted lines) after the current injection results in similar number of AP. (B) Firing frequency vs. membrane depolarization, one-way RM ANOVA ( $F_{(1,31)} = 0.43$ ,  $p = 0.52$ ). (C) Representative recordings of mEPSCs. (D) Representative average mEPSCs. (E) mEPSCs frequency, two-tails unpaired t test ( $t = 2.30$  df = 23,  $p = 0.03$ ). (F) mEPSCs amplitude, two-tails unpaired t test ( $t = 1.37$  df = 23,  $p = 0.18$ ). Sample size ( $N =$  neurons/mice), for B: WT:  $N = 17/3$ ; LSL:  $N = 16/3$  and for E, F: WT:  $N = 14/7$ ; LSL:  $N = 11/6$ . Data represents dot plots (one neuron) with mean  $\pm$  SEM. \* $p \leq 0.05$ .

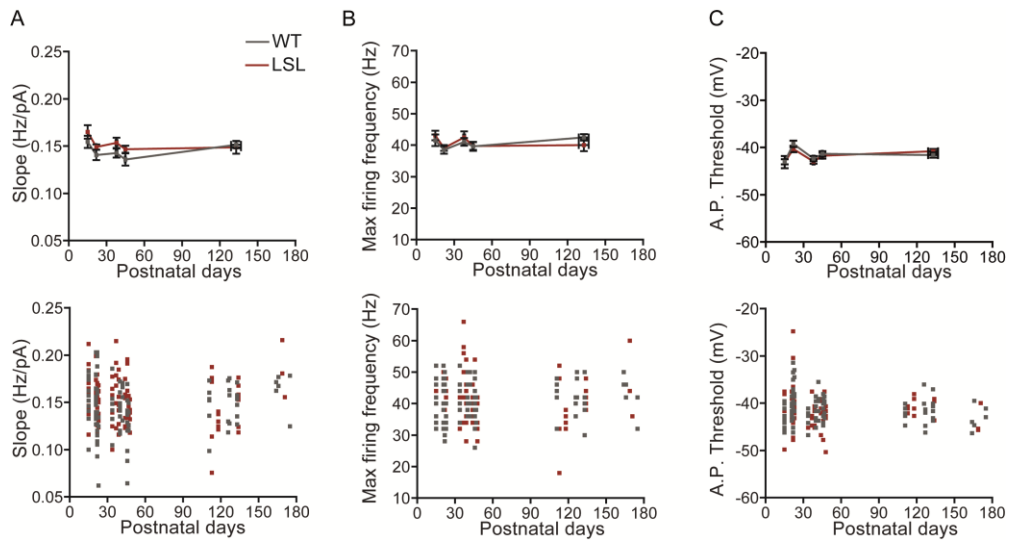

**Supplementary Figure 2. Neurodevelopmental profile (Active properties) – refers to Figure 2.**

(A) F-I Slope (top), mean  $\pm$  SEM showing similar changes between LSL and WT over time (table S2); individual data obtained at different time points during development (bottom); regression analysis did not reveal a significant correlation for majority of the tested models (table 3); (B) Maximum firing rate mean  $\pm$  SEM (top) showing similar changes for LSL and WT over time (table S2); individual data obtained at different time points during development (bottom); regression analysis did not reveal a significant correlation for majority of the tested model (table 3) (C) AP Threshold Mean  $\pm$  SEM (top) showing similar changes between LSL and WT over time (table S2); individual data obtained at different time points during development (bottom); regression analysis did not reveal a significant correlation for majority of the tested model (table 3).

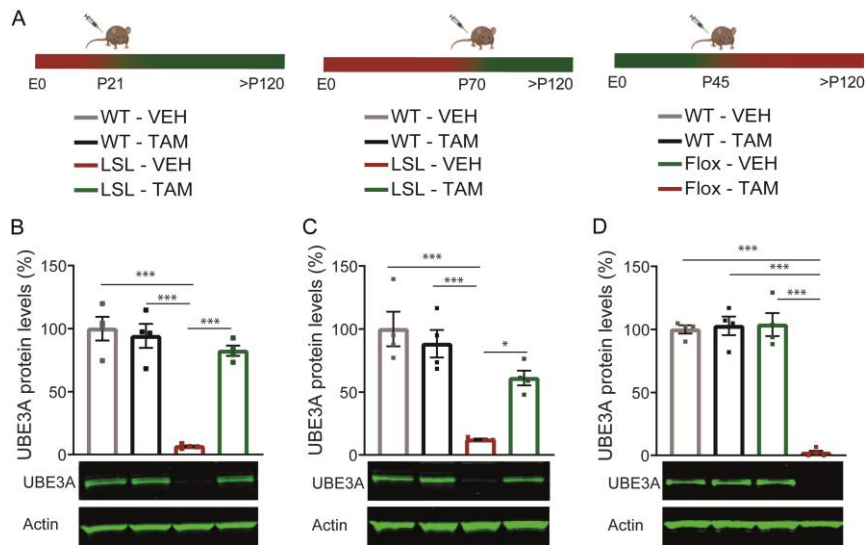

**Supplementary Figure 3. UBE3A levels** – refers to Figure 4 and 5 (A) Schematic representation of *Ube3a* gene reinstatement (left, middle) or deletion (right) at different time points during development and the time point of Western blot quantification of UBE3A proteins (B), (C), (D) Relative UBE3A expression (top), Examples of Western blot analysis in striatum (bottom), after reinstatement of *Ube3* gene at P21 in (B), P70 in (C), and deletion of *Ube3* gene at P45 in (D). Two-way RM ANOVA: (B) ( $F_{(1, 12)} = 33.66$ ,  $p < 0.001$ ), *Post hoc* Bonferroni: LSL-VEH against WT-VEH ( $p < 0.001$ ), LSL-VEH against WT-TAM ( $p < 0.001$ ), LSL-VEH against LSL-TAM ( $p < 0.001$ ), LSL-TAM against WT-TAM ( $p = 1$ ); (C) ( $F_{(1, 12)} = 10.60$ ,  $p = 0.007$ ), *Post hoc* Bonferroni: LSL-VEH against WT-VEH ( $p < 0.001$ ), LSL-VEH against WT-TAM ( $p < 0.001$ ), LSL-VEH against LSL-TAM ( $p = 0.018$ ), LSL-TAM against WT-TAM ( $p = 1$ ); (D) ( $F_{(1, 12)} = 72.27$ ,  $p < 0.001$ ), *Post hoc* Bonferroni: Flox-TAM against WT-VEH ( $p < 0.001$ ), Flox-TAM against WT-TAM ( $p < 0.001$ ), Flox-VEH against Flox-TAM ( $p < 0.001$ ), Flox-VEH against WT-VEH ( $p = 1$ ). Sample size:  $N = 4$  mice in each condition.: Data represents dot plots (one mouse) with mean  $\pm$  SEM. \* $p \leq 0.05$ , \*\*\* $p \leq 0.001$

## Supplementary Tables

Supplementary Table 1. Developmental profile of the electrophysiological phenotypes (passive properties and synaptic transmission) – refers to Figure 1 and 2

| Figure   | Parameter | Age                                    | Genotypes (Mean $\pm$ SEM) |                    | Statistics         |                          |       |
|----------|-----------|----------------------------------------|----------------------------|--------------------|--------------------|--------------------------|-------|
|          |           |                                        | WT                         | LSL                | Test               | p value                  |       |
| Figure 2 | C         | Rheobase (pA)                          | P15                        | 104.62 $\pm$ 9.25  | 100.77 $\pm$ 13.33 | Post hoc Anova, LSD test | 0.877 |
|          |           |                                        | P21                        | 189.15 $\pm$ 9.87  | 150.79 $\pm$ 6.66  |                          | 0.010 |
|          |           |                                        | P35                        | 252.95 $\pm$ 19.33 | 180.00 $\pm$ 15.01 |                          | 0.000 |
|          |           |                                        | P45                        | 276.00 $\pm$ 19.27 | 180.0 $\pm$ 15.89  |                          | 0.000 |
|          |           |                                        | P130 <sup>a</sup>          | 287.78 $\pm$ 13.20 | 198.62 $\pm$ 9.68  |                          | 0.000 |
|          | D         | Capacitance (pF)                       | P15                        | 68.70 $\pm$ 1.73   | 71.80 $\pm$ 3.15   |                          | 0.698 |
|          |           |                                        | P21                        | 105.00 $\pm$ 3.90  | 88.30 $\pm$ 2.86   |                          | 0.001 |
|          |           |                                        | P35                        | 111.00 $\pm$ 4.52  | 89.60 $\pm$ 4.60   |                          | 0.001 |
|          |           |                                        | P45                        | 109.00 $\pm$ 4.72  | 89.30 $\pm$ 5.80   |                          | 0.002 |
|          |           |                                        | P130 <sup>a</sup>          | 114.00 $\pm$ 4.91  | 100.00 $\pm$ 3.73  |                          | 0.016 |
|          | E         | Input resistance hyperpolarized (Mohm) | P15                        | 106.50 $\pm$ 8.19  | 124.93 $\pm$ 8.03  |                          | 0.029 |
|          |           |                                        | P21                        | 58.71 $\pm$ 3.51   | 72.39 $\pm$ 3.54   |                          | 0.016 |
|          |           |                                        | P35                        | 46.90 $\pm$ 5.87   | 60.31 $\pm$ 5.60   |                          | 0.087 |
|          |           |                                        | P45                        | 46.59 $\pm$ 4.54   | 63.27 $\pm$ 5.44   |                          | 0.014 |
|          |           |                                        | P130 <sup>a</sup>          | 41.36 $\pm$ 3.20   | 54.87 $\pm$ 3.02   |                          | 0.032 |
|          | F         | Input resistance depolarized (Mohm)    | P15                        | 552.10 $\pm$ 66.34 | 467.30 $\pm$ 66.86 |                          | 0.358 |
|          |           |                                        | P21                        | 419.20 $\pm$ 40.55 | 535.00 $\pm$ 48.27 |                          | 0.043 |
|          |           |                                        | P35                        | 314.01 $\pm$ 58.72 | 472.30 $\pm$ 56.49 |                          | 0.036 |
|          |           |                                        | P45                        | 227.80 $\pm$ 41.71 | 430.50 $\pm$ 64.52 |                          | 0.007 |
|          |           |                                        | P130 <sup>a</sup>          | 209.30 $\pm$ 20.99 | 352.40 $\pm$ 39.50 |                          | 0.039 |
|          | H         | sEPSC frequency (Hz)                   | P15                        | 1.18 $\pm$ 0.09    | 1.45 $\pm$ 0.20    |                          | 0.541 |
|          |           |                                        | P21                        | 2.89 $\pm$ 0.19    | 2.37 $\pm$ 0.15    |                          | 0.014 |
|          |           |                                        | P35                        | 3.35 $\pm$ 0.19    | 2.38 $\pm$ 0.25    |                          | 0.021 |
|          |           |                                        | P45                        | 3.40 $\pm$ 0.20    | 2.50 $\pm$ 0.16    |                          | 0.045 |
|          |           |                                        | P130 <sup>a</sup>          | 3.86 $\pm$ 0.33    | 2.92 $\pm$ 0.23    |                          | 0.000 |

a) Refers also to Mean and SEM in Figure 1

**Supplementary Table 2. Developmental profile of the electrophysiological phenotypes (active properties) – refers to Figure I and 2 and SI**

| Figure                 | Parameter | Age                           | Genotypes (Mean ± SEM) |               | Statistics    |                          |       |
|------------------------|-----------|-------------------------------|------------------------|---------------|---------------|--------------------------|-------|
|                        |           |                               | WT                     | LSL           | Test          | p value                  |       |
| Supplementary Figure I | A         | F-I slope (Hz/s)              | P15                    | 0.16 ± 0.007  | 43.08 ± 1.60  | Post hoc Anova, LSD test | 0.287 |
|                        |           |                               | P21                    | 0.15 ± 0.006  | 39.16 ± 0.93  |                          | 0.160 |
|                        |           |                               | P35                    | 0.15 ± 0.005  | 42.53 ± 1.94  |                          | 0.172 |
|                        |           |                               | P45                    | 0.148 ± 0.007 | 39.76 ± 1.19  |                          | 0.146 |
|                        |           |                               | PI30 <sup>a</sup>      | 0.16 ± 0.004  | 40.10 ± 1.94  |                          | 0.735 |
|                        | B         | Maximum firing frequency (Hz) | P15                    | 41.54 ± 1.83  | 43.08 ± 1.60  |                          | 0.562 |
|                        |           |                               | P21                    | 38.52 ± 1.21  | 39.16 ± 0.93  |                          | 0.685 |
|                        |           |                               | P35                    | 41.06 ± 1.20  | 42.53 ± 1.94  |                          | 0.499 |
|                        |           |                               | P45                    | 39.6 ± 1.4334 | 39.76 ± 1.19  |                          | 0.937 |
|                        |           |                               | PI30 <sup>a</sup>      | 42.45 ± 1.1   | 40.10 ± 1.94  |                          | 0.234 |
|                        | C         | AP threshold (mV)             | P15                    | -43.05 ± 0.55 | -43.08 ± 1.31 |                          | 0.980 |
|                        |           |                               | P21                    | -39.24 ± 0.73 | -40.32 ± 0.71 |                          | 0.186 |
|                        |           |                               | P35                    | -42.32 ± 0.56 | -42.96 ± 0.51 |                          | 0.573 |
|                        |           |                               | P45                    | -41.30 ± 0.59 | -41.72 ± 0.60 |                          | 0.666 |
|                        |           |                               | PI30 <sup>a</sup>      | -41.59 ± 0.52 | -40.76 ± 0.51 |                          | 0.381 |

a) Refers also to Mean and SEM in Figure I

Supplementary Table 3. Regression analysis of the developmental electrophysiological profile

| Rheobase                        |             |              |               |          |                |                  |             |             |
|---------------------------------|-------------|--------------|---------------|----------|----------------|------------------|-------------|-------------|
| Model Summary                   |             | R Square     | F(1, 110)     | Sig.     | Constant       | b1               | b2          | b3          |
| Equation <sup>a</sup>           | Linear      | 0.203        | 28.089        | 0        | 181.169        | 0.865            | n.a.        | n.a.        |
|                                 | Logarithmic | 0.335        | 55.335        | 0        | -22.131        | 67.966           | n.a.        | n.a.        |
|                                 | Inverse     | <b>0.442</b> | <b>87.084</b> | <b>0</b> | <b>327.689</b> | <b>-3109.781</b> | <b>n.a.</b> | <b>n.a.</b> |
|                                 | Quadratic   | 0.409        | 37.697        | 0        | 80.47          | 5.141            | -0.026      | n.a.        |
|                                 | Cubic       | 0.465        | 31.322        | 0        | -1.812         | 9.967            | -0.091      | 0           |
|                                 | Compound    | 0.197        | 26.931        | 0        | 165.098        | 1.004            | n.a.        | n.a.        |
|                                 | Power       | 0.335        | 55.33         | 0        | 59.139         | 0.342            | n.a.        | n.a.        |
|                                 | S           | 0.467        | 96.216        | 0        | 5.853          | -16.076          | n.a.        | n.a.        |
|                                 | Growth      | 0.197        | 26.931        | 0        | 5.107          | 0.004            | n.a.        | n.a.        |
|                                 | Exponential | 0.197        | 26.931        | 0        | 165.098        | 0.004            | n.a.        | n.a.        |
| Logistic                        | 0.197       | 26.931       | 0             | 0.006    | 0.996          | n.a.             | n.a.        |             |
| Capacitance                     |             |              |               |          |                |                  |             |             |
| Model Summary                   |             | R Square     | F(1, 100)     | Sig.     | Constant       | b1               | b2          | b3          |
| Equation <sup>a</sup>           | Linear      | 0.058        | 6.14          | 0.015    | 97.647         | 0.123            | n.a.        | n.a.        |
|                                 | Logarithmic | 0.14         | 16.308        | 0        | 60.712         | 11.795           | n.a.        | n.a.        |
|                                 | Inverse     | <b>0.24</b>  | <b>31.545</b> | <b>0</b> | <b>123.655</b> | <b>-611.015</b>  | <b>n.a.</b> | <b>n.a.</b> |
|                                 | Quadratic   | 0.304        | 21.637        | 0        | 67.656         | 1.374            | -0.007      | n.a.        |
|                                 | Cubic       | 0.307        | 14.472        | 0        | 62.752         | 1.66             | -0.011      | 1.45E-05    |
|                                 | Compound    | 0.058        | 6.213         | 0.014    | 94.892         | 1.001            | n.a.        | n.a.        |
|                                 | Power       | 0.15         | 17.702        | 0        | 64.853         | 0.121            | n.a.        | n.a.        |
|                                 | S           | 0.27         | 37.009        | 0        | 4.822          | -6.417           | n.a.        | n.a.        |
|                                 | Growth      | 0.058        | 6.213         | 0.014    | 4.553          | 0.001            | n.a.        | n.a.        |
|                                 | Exponential | 0.058        | 6.213         | 0.014    | 94.892         | 0.001            | n.a.        | n.a.        |
| Logistic                        | 0.058       | 6.213        | 0.014         | 0.011    | 0.999          | n.a.             | n.a.        |             |
| Input resistance hyperpolarized |             |              |               |          |                |                  |             |             |
| Model Summary                   |             | R Square     | F(1, 94)      | Sig.     | Constant       | b1               | b2          | b3          |
| Equation <sup>a</sup>           | Linear      | 0.152        | 16.834        | 0        | 69.821         | -0.232           | n.a.        | n.a.        |
|                                 | Logarithmic | 0.283        | 37.074        | 0        | 129.339        | -19.493          | n.a.        | n.a.        |
|                                 | Inverse     | <b>0.43</b>  | <b>70.993</b> | <b>0</b> | <b>27.085</b>  | <b>951.31</b>    | <b>n.a.</b> | <b>n.a.</b> |
|                                 | Quadratic   | 0.348        | 24.84         | 0        | 100.744        | -1.516           | 0.008       | n.a.        |
|                                 | Cubic       | 0.43         | 23.103        | 0        | 131.859        | -3.324           | 0.032       | -9.03E-05   |
|                                 | Compound    | 0.169        | 19.052        | 0        | 63.3           | 0.996            | n.a.        | n.a.        |
|                                 | Power       | 0.304        | 40.996        | 0        | 168.621        | -0.322           | n.a.        | n.a.        |
|                                 | S           | 0.433        | 71.688        | 0        | 3.454          | 15.212           | n.a.        | n.a.        |
|                                 | Growth      | 0.169        | 19.052        | 0        | 4.148          | -0.004           | n.a.        | n.a.        |
|                                 | Exponential | 0.169        | 19.052        | 0        | 63.3           | -0.004           | n.a.        | n.a.        |
| Logistic                        | 0.169       | 19.052       | 0             | 0.016    | 1.004          | n.a.             | n.a.        |             |
| Input resistance depolarized    |             |              |               |          |                |                  |             |             |
| Model Summary                   |             | R Square     | F(1, 107)     | Sig.     | Constant       | b1               | b2          | b3          |
| Equation <sup>a</sup>           | Linear      | 0.137        | 16.967        | 0        | 433.025        | -1.823           | n.a.        | n.a.        |
|                                 | Logarithmic | 0.207        | 27.849        | 0        | 841.182        | -137.704         | n.a.        | n.a.        |

|                             |                      |                 |                  |             |                 |                 |             |             |
|-----------------------------|----------------------|-----------------|------------------|-------------|-----------------|-----------------|-------------|-------------|
|                             | <b>Inverse</b>       | <b>0.255</b>    | <b>36.538</b>    | <b>0</b>    | <b>139.753</b>  | <b>6075.632</b> | <b>n.a.</b> | <b>n.a.</b> |
|                             | <b>Quadratic</b>     | 0.222           | 15.084           | 0           | 600.932         | -8.918          | 0.042       | n.a.        |
|                             | <b>Cubic</b>         | 0.267           | 12.74            | 0           | 788.779         | -19.924         | 0.193       | -0.001      |
|                             | <b>Compound</b>      | 0.147           | 18.438           | 0           | 360.306         | 0.995           | n.a.        | n.a.        |
|                             | <b>Power</b>         | 0.233           | 32.574           | 0           | 1262.669        | -0.421          | n.a.        | n.a.        |
|                             | <b>S</b>             | 0.296           | 45.016           | 0           | 4.99            | 18.824          | n.a.        | n.a.        |
|                             | <b>Growth</b>        | 0.147           | 18.438           | 0           | 5.887           | -0.005          | n.a.        | n.a.        |
|                             | <b>Exponential</b>   | 0.147           | 18.438           | 0           | 360.306         | -0.005          | n.a.        | n.a.        |
|                             | <b>Logistic</b>      | 0.147           | 18.438           | 0           | 0.003           | 1.005           | n.a.        | n.a.        |
| <b>sEPSCF frequency</b>     |                      |                 |                  |             |                 |                 |             |             |
|                             | <b>Model Summary</b> | <b>R Square</b> | <b>F(1, 95)</b>  | <b>Sig.</b> | <b>Constant</b> | <b>b1</b>       | <b>b2</b>   | <b>b3</b>   |
| <b>Equation<sup>a</sup></b> | <b>Linear</b>        | 0.239           | 29.808           | 0           | 2.376           | 0.016           | n.a.        | n.a.        |
|                             | <b>Logarithmic</b>   | 0.319           | 44.509           | 0           | -0.949          | 1.151           | n.a.        | n.a.        |
|                             | <b>Inverse</b>       | <b>0.362</b>    | <b>53.888</b>    | <b>0</b>    | <b>4.841</b>    | <b>-48.043</b>  | <b>n.a.</b> | <b>n.a.</b> |
|                             | <b>Quadratic</b>     | 0.346           | 24.827           | 0           | 1.157           | 0.07            | 0           | n.a.        |
|                             | <b>Cubic</b>         | 0.346           | 16.393           | 0           | 1.066           | 0.075           | 0           | 2.84E-07    |
|                             | <b>Compound</b>      | 0.194           | 22.849           | 0           | 2.123           | 1.005           | n.a.        | n.a.        |
|                             | <b>Power</b>         | 0.288           | 38.408           | 0           | 0.655           | 0.402           | n.a.        | n.a.        |
|                             | <b>S</b>             | 0.372           | 56.276           | 0           | 1.638           | -17.908         | n.a.        | n.a.        |
|                             | <b>Growth</b>        | 0.194           | 22.849           | 0           | 0.753           | 0.005           | n.a.        | n.a.        |
|                             | <b>Exponential</b>   | 0.194           | 22.849           | 0           | 2.123           | 0.005           | n.a.        | n.a.        |
|                             | <b>Logistic</b>      | 0.194           | 22.849           | 0           | 0.471           | 0.995           | n.a.        | n.a.        |
| <b>F-I Slope</b>            |                      |                 |                  |             |                 |                 |             |             |
|                             | <b>Model Summary</b> | <b>R Square</b> | <b>F(1, 110)</b> | <b>Sig.</b> | <b>Constant</b> | <b>b1</b>       | <b>b2</b>   | <b>b3</b>   |
| <b>Equation<sup>a</sup></b> | <b>Linear</b>        | 0.017           | 1.904            | 0.17        | 0.14            | 7.48E-05        | n.a.        | n.a.        |
|                             | <b>Logarithmic</b>   | 0.004           | 0.479            | 0.49        | 0.136           | 0.002           | n.a.        | n.a.        |
|                             | <b>Inverse</b>       | 0               | 0.024            | 0.877       | 0.144           | 0.021           | n.a.        | n.a.        |
|                             | <b>Quadratic</b>     | 0.049           | 2.81             | 0.065       | 0.152           | 0               | 3.03E-06    |             |
|                             | <b>Cubic</b>         | 0.059           | 2.256            | 0.086       | 0.162           | -0.001          | 1.13E-05    | -3.08E-08   |
|                             | <b>Compound</b>      | 0.019           | 2.154            | 0.145       | 0.137           | 1.001           | n.a.        | n.a.        |
|                             | <b>Power</b>         | 0.006           | 0.674            | 0.413       | 0.131           | 0.021           | n.a.        | n.a.        |
|                             | <b>S</b>             | 0               | 0                | 0.995       | -1.956          | 0.006           | n.a.        | n.a.        |
|                             | <b>Growth</b>        | 0.019           | 2.154            | 0.145       | -1.989          | 0.001           | n.a.        | n.a.        |
|                             | <b>Exponential</b>   | 0.019           | 2.154            | 0.145       | 0.137           | 0.001           | n.a.        | n.a.        |
|                             | <b>Logistic</b>      | 0.019           | 2.154            | 0.145       | 7.305           | 0.999           | n.a.        | n.a.        |
| <b>Maximum firing rate</b>  |                      |                 |                  |             |                 |                 |             |             |
|                             | <b>Model Summary</b> | <b>R Square</b> | <b>F(1, 110)</b> | <b>Sig.</b> | <b>Constant</b> | <b>b1</b>       | <b>b2</b>   | <b>b3</b>   |
| <b>Equation<sup>a</sup></b> | <b>Linear</b>        | 0.027           | 3.108            | 0.081       | 39.168          | 0.022           | n.a.        | n.a.        |
|                             | <b>Logarithmic</b>   | 0.023           | 2.538            | 0.114       | 35.798          | 1.247           | n.a.        | n.a.        |
|                             | <b>Inverse</b>       | 0.011           | 1.234            | 0.269       | 41.506          | -34.836         | n.a.        | n.a.        |
|                             | <b>Quadratic</b>     | 0.028           | 1.555            | 0.216       | 38.914          | 0.033           | -6.48E-05   |             |
|                             | <b>Cubic</b>         | 0.034           | 1.265            | 0.29        | 40.845          | -0.08           | 0.001       | -5.76E-06   |
|                             | <b>Compound</b>      | 0.029           | 3.342            | 0.07        | 38.616          | 1.001           | n.a.        | n.a.        |

|                             |                      |                 |                  |             |                 |           |             |             |
|-----------------------------|----------------------|-----------------|------------------|-------------|-----------------|-----------|-------------|-------------|
|                             | <b>Power</b>         | 0.025           | 2.835            | 0.095       | 35.251          | 0.034     | <i>n.a.</i> | <i>n.a.</i> |
|                             | <b>S</b>             | 0.013           | 1.472            | 0.228       | 3.717           | -0.967    | <i>n.a.</i> | <i>n.a.</i> |
|                             | <b>Growth</b>        | 0.029           | 3.342            | 0.07        | 3.654           | 0.001     | <i>n.a.</i> | <i>n.a.</i> |
|                             | <b>Exponential</b>   | 0.029           | 3.342            | 0.07        | 38.616          | 0.001     | <i>n.a.</i> | <i>n.a.</i> |
|                             | <b>Logistic</b>      | 0.029           | 3.342            | 0.07        | 0.026           | 0.999     | <i>n.a.</i> | <i>n.a.</i> |
| <b>AP Threshold</b>         |                      |                 |                  |             |                 |           |             |             |
|                             | <b>Model Summary</b> | <b>R Square</b> | <b>F(1, 110)</b> | <b>Sig.</b> | <b>Constant</b> | <b>b1</b> | <b>b2</b>   | <b>b3</b>   |
| <b>Equation<sup>a</sup></b> | <b>Linear</b>        | 0.001           | 0.171            | 0.68        | 41.21           | 0.002     | <i>n.a.</i> | <i>n.a.</i> |
|                             | <b>Logarithmic</b>   | 0               | 0.088            | 0.767       | 40.981          | 0.093     | <i>n.a.</i> | <i>n.a.</i> |
|                             | <b>Inverse</b>       | 0               | 0.004            | 0.947       | 41.297          | 0.823     | <i>n.a.</i> | <i>n.a.</i> |
|                             | <b>Quadratic</b>     | 0.002           | 0.244            | 0.784       | 41.544          | -0.012    | 8.47E-05    | <i>n.a.</i> |
|                             | <b>Cubic</b>         | 0.014           | 0.993            | 0.397       | 40.178          | 0.068     | -0.001      | 4.27E-06    |
|                             | <b>S</b>             | 0               | 0.029            | 0.865       | 3.72            | -0.053    | <i>n.a.</i> | <i>n.a.</i> |
|                             | <b>Growth</b>        | 0.002           | 0.338            | 0.562       | 3.714           | 7.71E-05  | <i>n.a.</i> | <i>n.a.</i> |
|                             | <b>Exponential</b>   | 0.002           | 0.338            | 0.562       | 41.014          | 7.71E-05  | <i>n.a.</i> | <i>n.a.</i> |
|                             | <b>Logistic</b>      | 0.002           | 0.338            | 0.562       | 0.024           | 1         | <i>n.a.</i> | <i>n.a.</i> |
|                             | <b>Compound</b>      | 0.002           | 0.338            | 0.562       | 41.014          | 1         | <i>n.a.</i> | <i>n.a.</i> |
|                             | <b>Power</b>         | 0.001           | 0.262            | 0.609       | 40.564          | 0.004     | <i>n.a.</i> | <i>n.a.</i> |

a) Refers to the equations used in the different models:

Linear:  $F(\text{postnatal day}) = \text{Constant} + (b1 * \text{postnatal day})$ .

Logarithmic:  $F(\text{postnatal day}) = \text{Constant} + (b1 * \ln(\text{postnatal day}))$

Inverse:  $F(\text{postnatal day}) = \text{Constant} + (b1 / \text{postnatal day})$

Quadratic:  $F(\text{postnatal day}) = \text{Constant} + (b1 * \text{postnatal day}) + (b2 * \text{postnatal day} **2)$ .

Cubic:  $F(\text{postnatal day}) = \text{Constant} + (b1 * \text{postnatal day}) + (b2 * \text{postnatal day} **2) + (b3 * \text{postnatal day} **3)$

S-curve:  $F(\text{postnatal day}) = e^{**}(\text{Constant} + (b1 / \text{postnatal day}))$

Growth:  $F(\text{postnatal day}) = e^{**}(\text{Constant} + (b1 * \text{postnatal day}))$

Exponential:  $F(\text{postnatal day}) = \text{Constant} * (e^{**}(b1 * \text{postnatal day}))$

Logistic:  $F(\text{postnatal day}) = 1 / (1/u + (\text{Constant} * (b1** \text{postnatal day})))$

Compound:  $F(\text{postnatal day}) = \text{Constant} * (b1** \text{postnatal day})$

Power:  $F(\text{postnatal day}) = \text{Constant} * (\text{postnatal day} **b1)$



Supplementary Table 4. Critical windows for the electrophysiological phenotype – refers to Figure 4

| Panel | Parameter               | Ube3a manipulation |                | Mean ± SEM     |                | Statistics                                      |                              |                   |                    |       |
|-------|-------------------------|--------------------|----------------|----------------|----------------|-------------------------------------------------|------------------------------|-------------------|--------------------|-------|
|       |                         | Age                | Treatment      | Genotype       |                | Two-way ANOVA (genotype X treatment) F/p values | Post-hoc Bonferroni p values |                   |                    |       |
|       |                         |                    |                | WT             | LSL            |                                                 | LSL-VEH vs. WT-VEH           | LSL-VEH vs WT-TAM | LSL-VEH vs LSL-TAM |       |
| E     | Rheobase (pA)           | reinstatement      | P21            | VEH            | 261.54 ± 21.12 | 196.37 ± 10.76                                  | F(1,108) = 4.17, p = 0.044   | 0.041             | 0.006              | 0.001 |
|       |                         |                    |                | TAM            | 264.00 ± 13.34 | 257.50 ± 10.41                                  |                              |                   |                    |       |
|       |                         | L                  | P70            | VEH            | 304.12 ± 13.3  | 218.82 ± 15.06                                  | F(1,67) = 0.12, p = 0.76     | 0.009             | 0.004              | I     |
|       |                         |                    |                | TAM            | 260.77 ± 23.66 | 210.66 ± 17.24                                  |                              |                   |                    |       |
| S     | deletion                | P45                | WT             |                | Flox           | F(1,69) = 0.59, p = 0.49                        |                              |                   |                    |       |
|       |                         |                    | VEH            | 260.00 ± 10.10 | 275.56 ± 13.1  |                                                 |                              |                   |                    |       |
|       |                         | TAM                | 280.56 ± 14.78 | 249.42 ± 13.8  |                |                                                 |                              |                   |                    |       |
|       |                         |                    | WT             |                | LSL            |                                                 |                              |                   |                    |       |
| F     | Input Resistance (Mohm) | reinstatement      | P21            | VEH            | 162.17 ± 17.77 | 304.14 ± 22.77                                  | F(1,108) = 6.27, p = 0.014   | 0.003             | 0.0001             | 0.001 |
|       |                         |                    |                | TAM            | 185.58 ± 22.2  | 220.32 ± 25.53                                  |                              |                   |                    |       |
|       |                         | M                  | P70            | VEH            | 187.42 ± 17.18 | 349.00 ± 36.15                                  | F(1,67) = 0.04, p = 0.16     | 0.005             | 0.004              | I     |
|       |                         |                    |                | TAM            | 234.20 ± 19.75 | 292.70 ± 24.8                                   |                              |                   |                    |       |
| T     | deletion                | P45                | WT             |                | Flox           | F(1,69) = 1.99, p = 0.026                       |                              |                   |                    |       |
|       |                         |                    | VEH            | 147.46 ± 12.35 | 121.60 ± 9.16  |                                                 |                              |                   |                    |       |
|       |                         | TAM                | 118.02 ± 11.55 | 151.13 ± 15.35 |                |                                                 |                              |                   |                    |       |
|       |                         |                    | WT             |                | LSL            |                                                 |                              |                   |                    |       |
| G     | reinstatement           | P21                | VEH            | 4.70 ± 0.70    | 3.29 ± 0.25    | F(1,107) = 5.16,                                | 0.016                        | 0.3               | 0.3                |       |
|       |                         |                    | TAM            | 4.01 ± 0.35    | 4.02 ± 0.24    |                                                 |                              |                   |                    |       |
|       |                         | N                  | P70            | VEH            | 4.88 ± 0.38    | 3.08 ± 0.26                                     | F(1,87) = 0.22, p = 0.63     | 0.002             | 0.017              | I     |
|       |                         |                    |                | TAM            | 4.46 ± 0.31    | 3.02 ± 0.34                                     |                              |                   |                    |       |
| U     | sEPSC frequency (Hz)    | deletion           | P45            | WT             |                | Flox                                            | F(1,69) = 0.22, p = 0.63     |                   |                    |       |
|       |                         |                    |                | VEH            | 5.36 ± 0.33    | 5.25 ± 0.43                                     |                              |                   |                    |       |
|       |                         | TAM                | 4.60 ± 0.32    | 4.38 ± 0.34    |                |                                                 |                              |                   |                    |       |
|       |                         |                    | WT             |                | LSL            |                                                 |                              |                   |                    |       |
